# Supplementary material for: A defective bismuth–indium catalyst promotes water dissociation for selective carbon dioxide electroreduction to HCOOH
Source: Royal Society of Chemistry journal article supplement (doi:10.1039/d4qi00053f), 2024-01-01
Supplement: d4qi00053f1.pdf [file d4qi00053f1.pdf]

## Supporting Information

### Defective Bismuth-Indium Catalyst Promotes Water Dissociation for Selective Carbon Dioxide Electroreduction to Formate

Jieshu Zhou,<sup>a</sup> Liming Li,<sup>b,c</sup> Hangxing Ren,<sup>b,d</sup> Haibin Wang,<sup>a</sup> Yong Li,<sup>e</sup> Kangning Liu,<sup>a</sup> Liang Huang,<sup>e</sup> Xinyao Yang,<sup>e</sup> Zhen Hao,<sup>b</sup> Yuguang Zhang,<sup>b</sup> Zhichao Wang,<sup>e</sup> Xi Wang,<sup>a</sup> Jian Ding,<sup>e</sup> Yuping Ji,<sup>e</sup> Li Wang,<sup>a</sup> Hongyan Liang,<sup>\*a</sup>

- a. School of Materials Science and Engineering, Tianjin University, Tianjin 300350, P. R. China  
E-mail: hongyan.liang@tju.edu.cn
- b. PERIC Hydrogen Technologies Co., Ltd., Handan 056027, P. R. China
- c. School of Chemical Engineering and Technology, Tianjin University, Tianjin 300072, P.R. China.
- d. School of Materials Science and Engineering, Shanghai Jiao Tong University, Shanghai 200240, P.R. China
- e. CETC Deqing Huaying Electronics Co.,LTD., Deqing, Zhejiang, 313200, P.R. China

### Experimental section

## Chemicals

Bismuth (III) nitrate pentahydrate ( $\text{Bi}(\text{NO}_3)_3 \cdot 5\text{H}_2\text{O}$ ), potassium bicarbonate ( $\text{KHCO}_3$ ), and potassium borohydride ( $\text{KBH}_4$ ) were purchased from Aladdin. Indium nitrate pentahydrate (III) ( $\text{In}(\text{NO}_3)_3 \cdot 5\text{H}_2\text{O}$ ), sodium hypophosphite ( $\text{NaH}_2\text{PO}_2$ ), potassium hydroxide ( $\text{KOH}$ ), and isopropanol (IPA) were purchased from Macklin. Nafion solution (5wt%), dimethyl sulfoxide (DMSO), and deuterium oxide ( $\text{D}_2\text{O}$ ) were purchased from Sigma-Aldrich. All chemicals were used directly without further treatment.

## Synthesis of Catalysts

Synthesis of BiIn-P pre-catalyst: Deionized (DI) water (18.2 M $\Omega$ ) was used as solvent for the synthesis. The BiIn-P pre-catalyst was synthesized using a three-neck round-bottomed flask. First, a solution was made by dissolving 0.002 mol of  $\text{Bi}(\text{NO}_3)_3 \cdot 5\text{H}_2\text{O}$  and 0.004 mol of  $\text{In}(\text{NO}_3)_3 \cdot 5\text{H}_2\text{O}$  in DI water (20 mL) in a three-neck round-bottomed flask with continuous stirring at room temperature. Then, 230 mg  $\text{NaH}_2\text{PO}_2$  was added to the above solution with continuous oxygen flushing. The oxygen was flushed throughout the whole synthesis process. After 5 min, fresh-made 20 mL of  $\text{KBH}_4$  aqueous solution (1.2 M) was added into the above solution with vigorous stirring. After 1 h, the precipitate was collected by centrifuge and washed with DI water and ethanol, followed by vacuum drying at 60 °C overnight.

The synthesis methods of Bi-P pre-catalyst and In-P pre-catalyst are similar to the method for synthesizing BiIn-P pre-catalyst without adding  $\text{In}(\text{NO}_3)_3 \cdot 5\text{H}_2\text{O}$  or  $\text{Bi}(\text{NO}_3)_3 \cdot 5\text{H}_2\text{O}$  while keeping the total molar concentration as constant.

The synthesis method of BiIn pre-catalyst is similar to the method for synthesizing BiIn-P pre-catalyst without adding  $\text{NaH}_2\text{PO}_2$ .

## Physicochemical characterization

The morphologies of the synthesized catalysts were characterized by field-emission scanning electron microscopy (SEM, Hitachi S-4800), transmission electron microscopy (TEM, JEM-2100F), and energy-dispersive X-ray spectroscopy (EDS). The phase composition and crystallinity of the synthesized catalysts were characterized by powder X-ray diffraction (XRD, Bruker D8) with Cu  $K\alpha$  radiation. An X-ray photoelectron spectrometer (XPS, Kratos AXIS SUPRA+) was used to analyze the chemical states of the synthesized catalysts. *In-situ* Raman experiments were performed using a Renishaw spectrometer (Renishaw, inVia microscope) in a homemade  $\text{CO}_2$ -saturated 0.1 M  $\text{KHCO}_3$  aqueous solution as the electrolyte.

## Electrode preparation

To prepare the deposition ink, 10 mg of the precursor was dispersed in a mixture of 0.40 mL IPA, 0.45 mL DI water, and 50  $\mu\text{L}$  5wt% Nafion solution and then sonicated for at least 1 hour. The ink was air-brushed onto  $2 \times 4 \text{ cm}^2$  carbon paper (Toray TGP-H-060 with an MPL layer).

## Electrochemical Measurements

The  $\text{CO}_2$  electroreduction performance activity of the catalysts was investigated in 1.0 M KOH electrolyte by using a flow-cell configuration connected to an electrochemical workstation (CHI660E). We cut the as-prepared spray-coated gas diffusion layer into  $1 \times 1 \text{ cm}^2$  electrodes for testing. Flow-cell configuration consists of catalysts spray-coated gas diffusion layer as the cathode ( $1 \times 1 \text{ cm}^2$ ), an anion exchanged membrane (AEM, Fumasep FAA-3-PK-130) as the membrane, and Ni foam as the anode ( $1 \times 1 \text{ cm}^2$ ), Ag/AgCl was used as the reference electrode.  $\text{CO}_2$  gas flowed behind the gas diffusion layer at a rate of 50 mL/min. The gaseous products were detected by GC (GC-2060A) equipped with a thermal conductivity detector (TCD) and flame ionization detector (FID) detector. Liquid products were quantified by analyzing the collected electrolytes using NMR (Bruker, AVANCE IIITM HD 400 MHz). DMSO was added as an internal standard. All the electrode potentials were converted to values regarding the RHE using the following equation:

$$E_{\text{RHE}} = E_{\text{Ag/AgCl}} + 0.197 \text{ V} + 0.0591 \times \text{pH} + 85\% iR$$

where  $R$  is the EIS-determined series resistance.  $R$  was measured using the electrochemical impedance spectroscopy technique (EIS, frequency ranges from 100 kHz to 0.1 Hz and amplitude of 5 mV).

The MEA electrolyser was composed of anode and cathode flow field plates with a serpentine-configuration flow field for the continuous supply of anolyte (0.1 M  $\text{KCO}_3$ ) and humidified  $\text{CO}_2$ . The MEA was composed of three components: a cathode electrode (catalysts sprayed onto a carbon paper), an anode electrode (iridium oxide deposited titanium foam), and an anion exchange membrane (AEM, Sustainion X37-50 grade 60 membrane). The full-cell potentials are presented without  $iR$ -correction.

## Theoretical calculation details

All DFT calculations were carried out within the periodic plane wave framework as implemented in Vienna Ab initio Simulation Package.<sup>1</sup> The (003) surface of Bi, the (101) surface of In, and the (310) surface of  $\text{Bi}_3\text{In}_5$  were used as the models. We use the generalized gradient approximation (GGA) with Perdew-Burke-Ernzerhof (PBE) form to describe the exchange-correlation contributions to the total energy.<sup>2</sup> Plane-wave cut-off energy of 400 eV and a  $3 \times 3 \times 1$   $\Gamma$ -centered k-points grid generated by

the Monkhorst-Pack scheme were used for all the calculations. The convergence criteria for the electronic self-consistent iteration energy and force were set to  $10^{-5}$  eV and 0.05 eV/Å,

The reaction energies ( $\Delta G$ ) were obtained by:  
$$\Delta G = \Delta E_{\text{DFT}} + \Delta \text{ZPE} - T\Delta S$$

Where  $\Delta E_{\text{DFT}}$  is the reaction energy calculated from DFT;  $\Delta \text{ZPE}$  is the zero-point energy;  $\Delta S$  is the change in entropy. In this work, the values of  $\Delta \text{ZPE}$  and  $\Delta S$  of intermediate were obtained by vibration frequency calculation. The following corrections were applied to partially counterbalance the overestimation from DFT calculations:  $\text{CO}_2$  (0.45 eV),  $\text{H}_2$  (− 0.09 eV), and  $\text{HCOOH}$  (0.20 eV).<sup>3</sup>

## Supplementary Figures

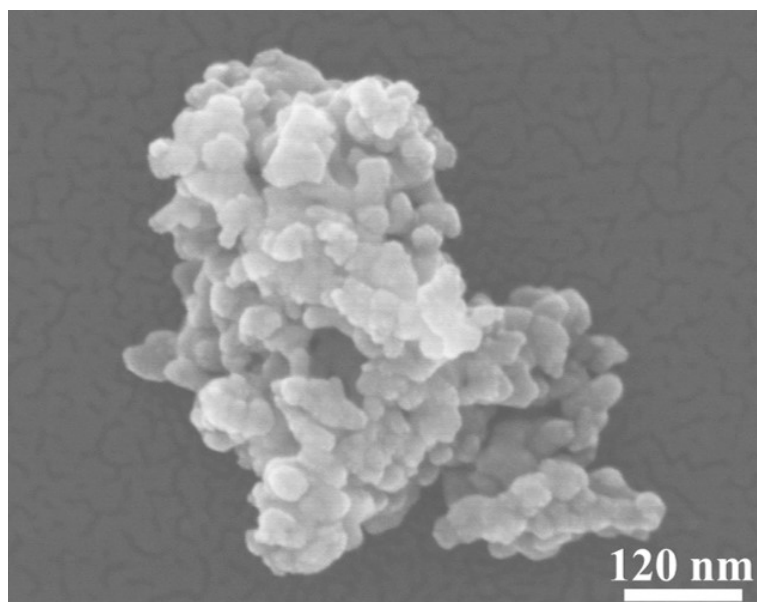

**Fig. S1.** SEM image of the BiIn-P pre-catalyst.

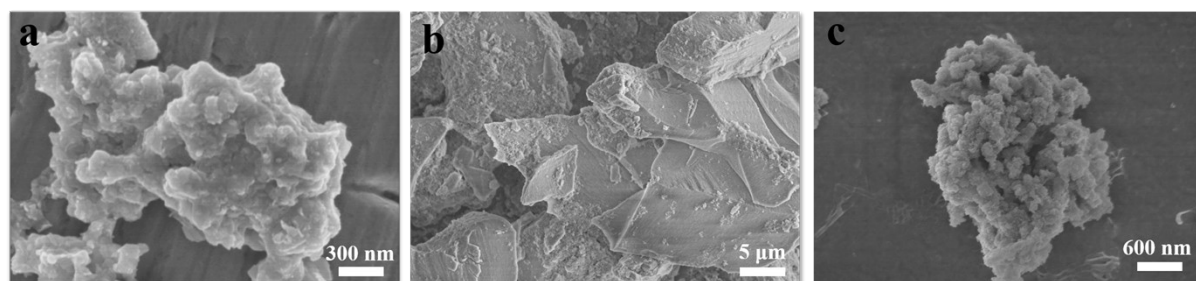

**Fig. S2.** SEM images of (a) Bi-P, (b) In-P, and (c) BiIn pre-catalysts.

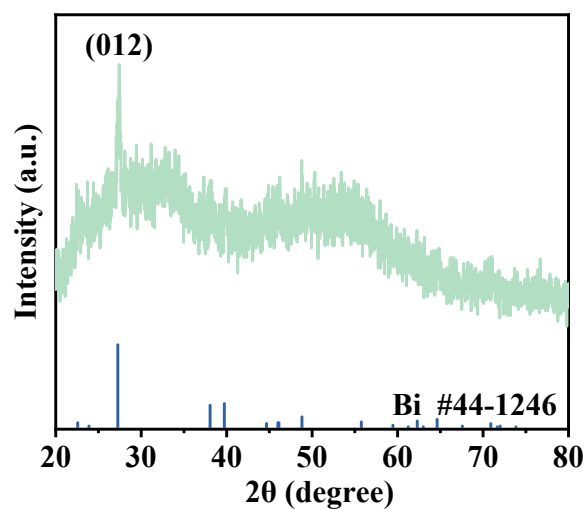

**Fig. S3.** XRD pattern of the BiIn-P pre-catalyst.

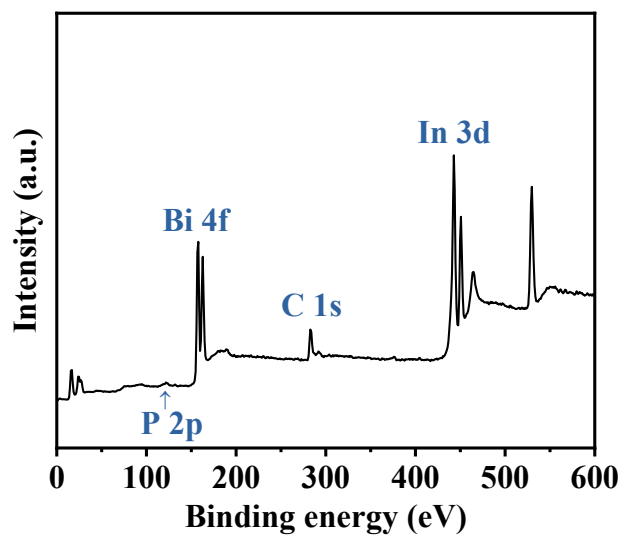

**Fig. S4.** XPS survey spectrum of the BiIn-P pre-catalyst.

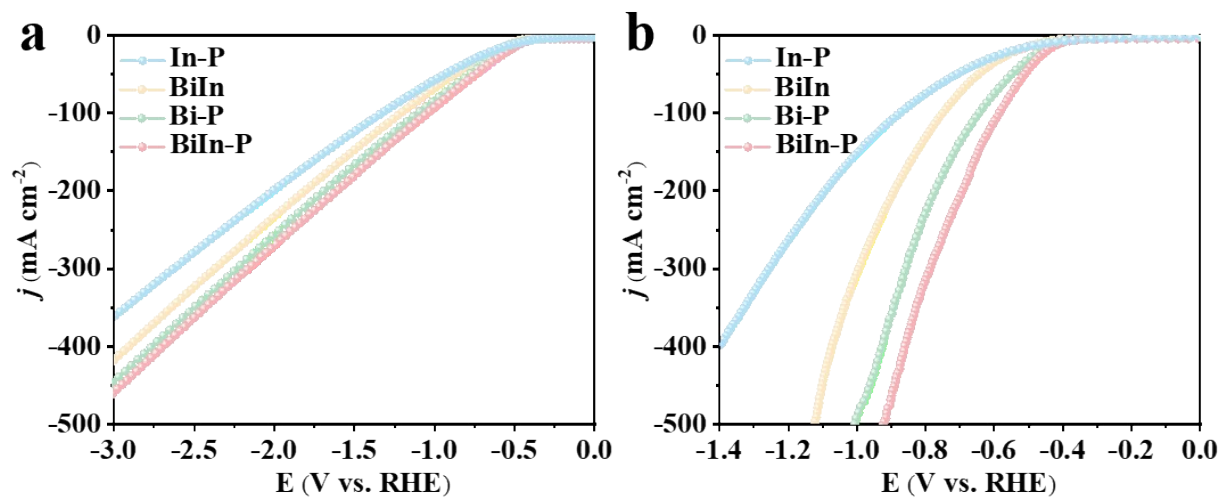

**Fig. S5.** LSV results of In-P, BiIn, Bi-P, and BiIn-P pre-catalysts in 1.0 M KOH (a) without and (b) with  $iR$  compensation.

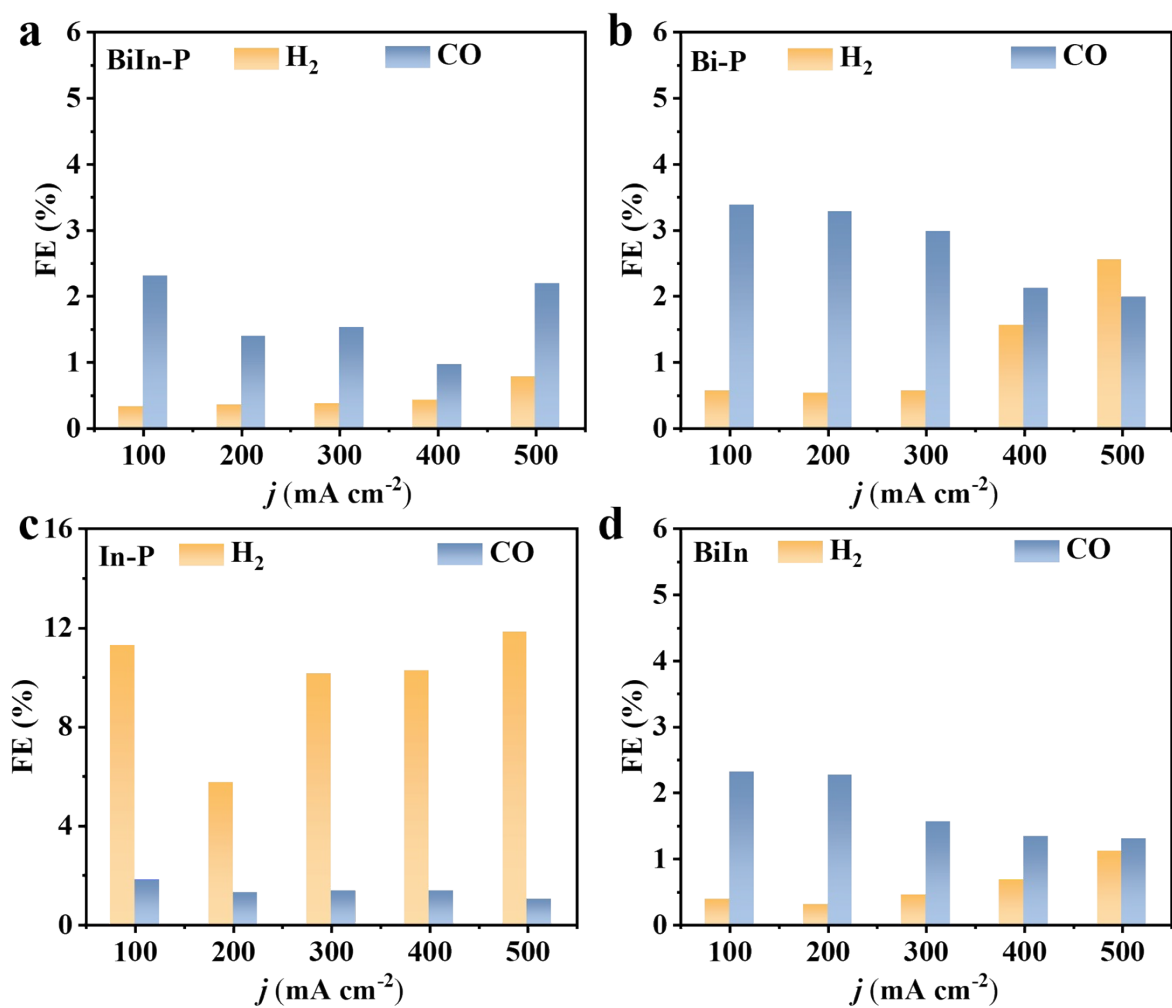

**Fig. S6.** Faradaic efficiencies of H<sub>2</sub> and CO for (a) BiIn-P, (b) Bi-P, (c) In-P, and (d) BiIn at different current densities in 1.0 M KOH.

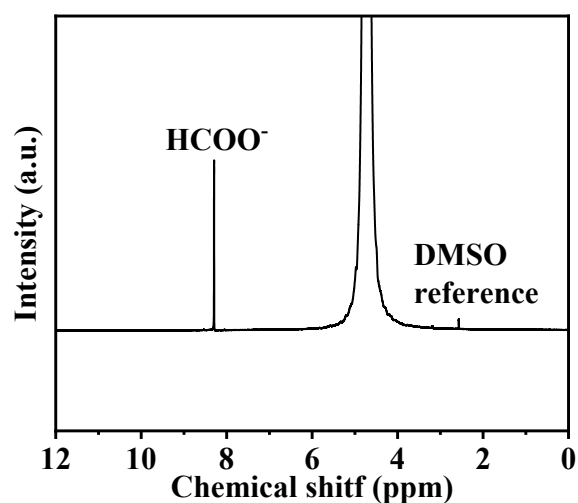

Fig. S7. NMR spectrum of the liquid product in the Flow-cell test.

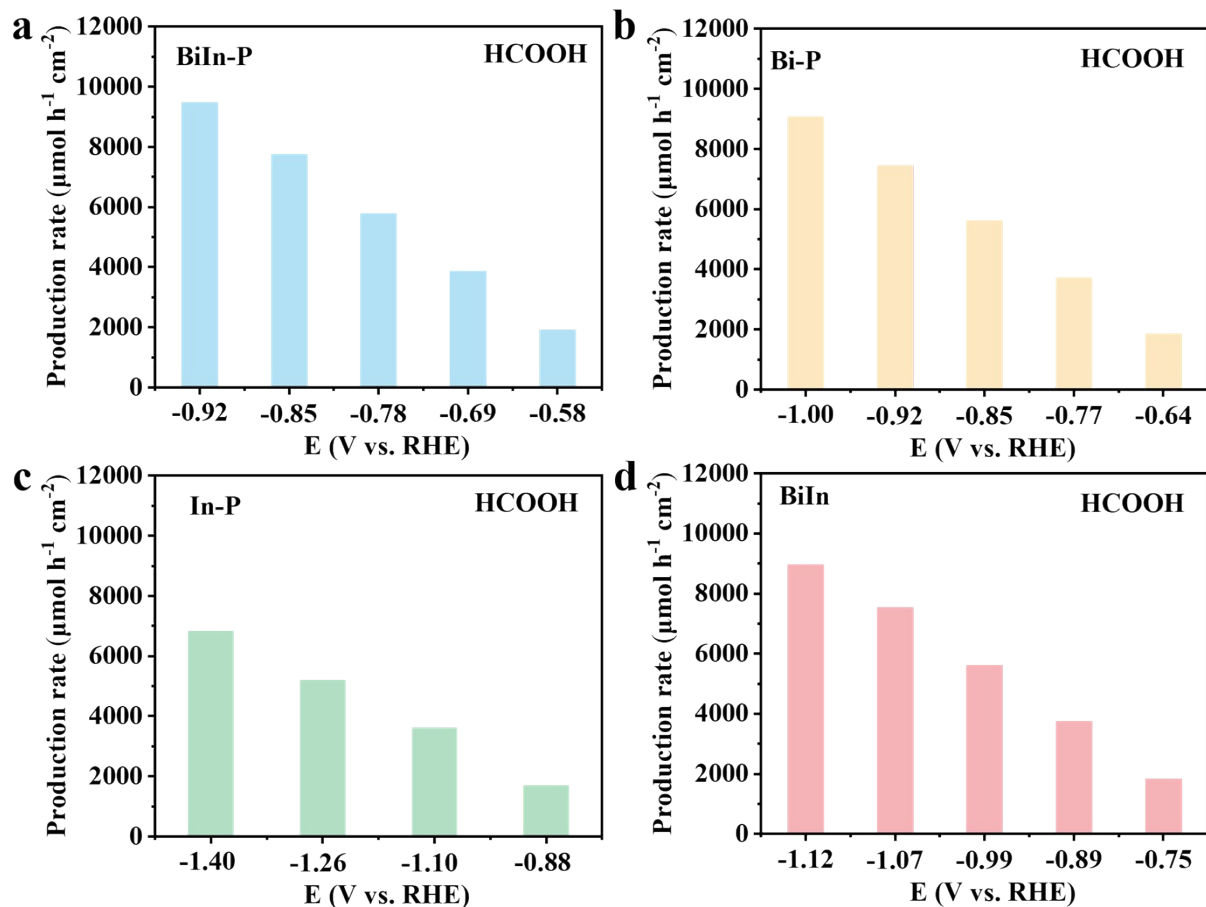

Fig. S8. Production rate of HCOOH over BiIn-P, Bi-P, In-P, and BiIn pre-catalysts at various potentials.

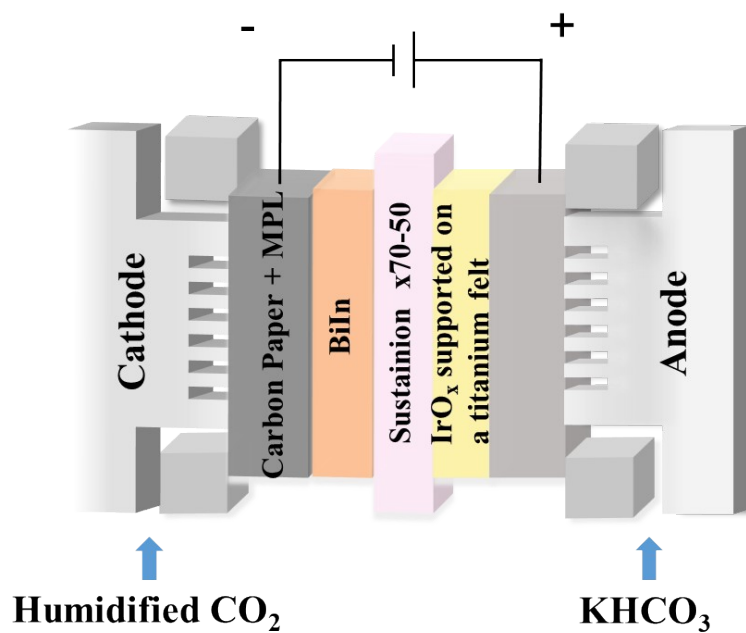

**Fig. S9.** Schematic diagram of CO<sub>2</sub> reduction in an MEA.

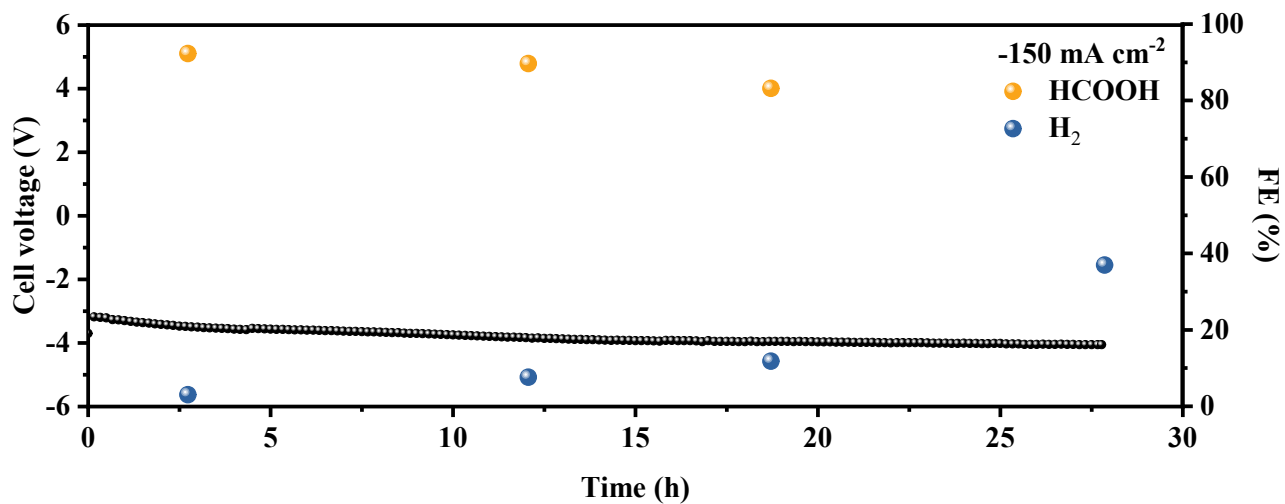

**Fig. S10.** Long-term chronopotentiometry result and the FEs of H<sub>2</sub> and HCOOH for the BiIn-P pre-catalyst in an MEA.

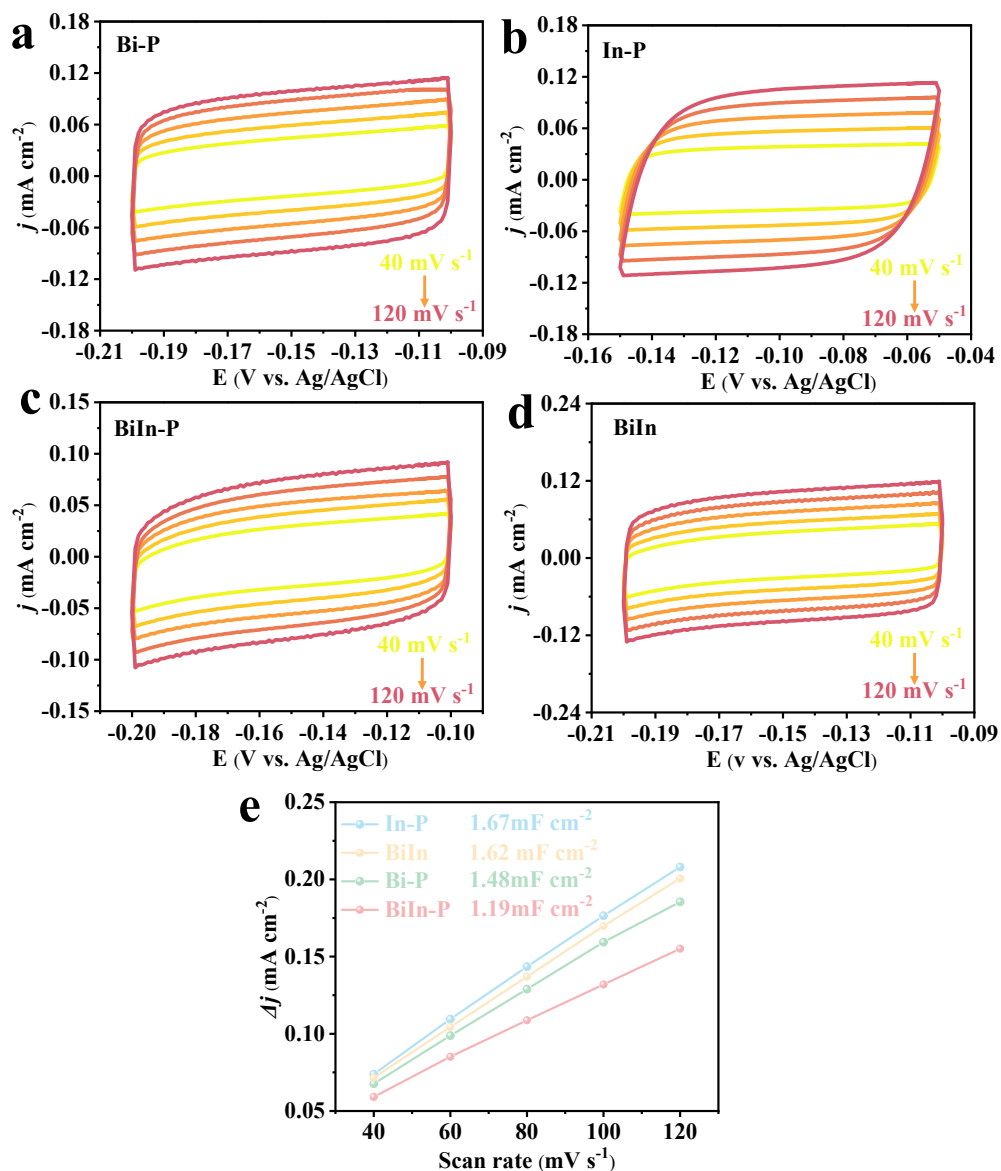

**Fig. S11.** CV curves of (a) Bi-P, (b) In-P, (c) BiIn-P, and (d) BiIn pre-catalysts in 1.0 M KOH. (e) Differences in current density variation against the scan rate, and using a linear fitting method to estimate the  $C_{dl}$ .

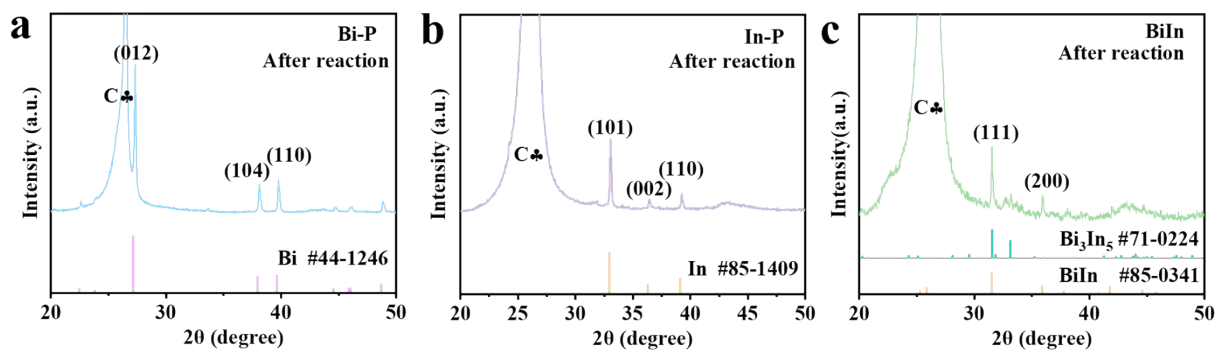

**Fig. S12.** XRD patterns of (a) Bi-P, (b) In-P, and (c) BiIn after the reaction.

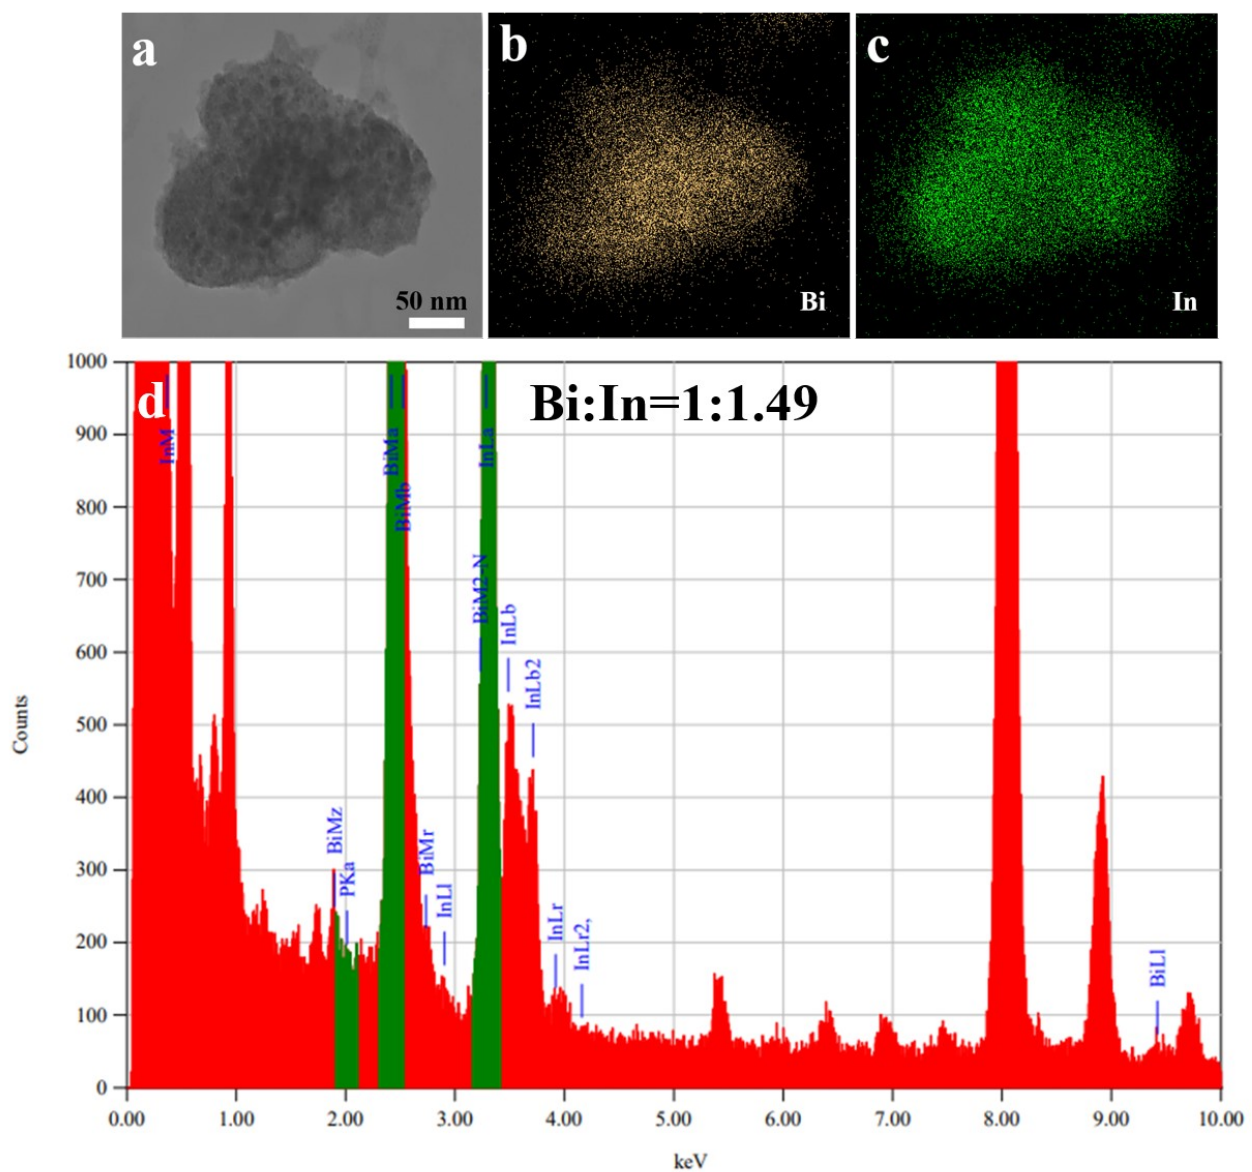

**Fig. S13.** (a) TEM and (b-d) EDS of BiIn-P pre-catalysts after the reaction.

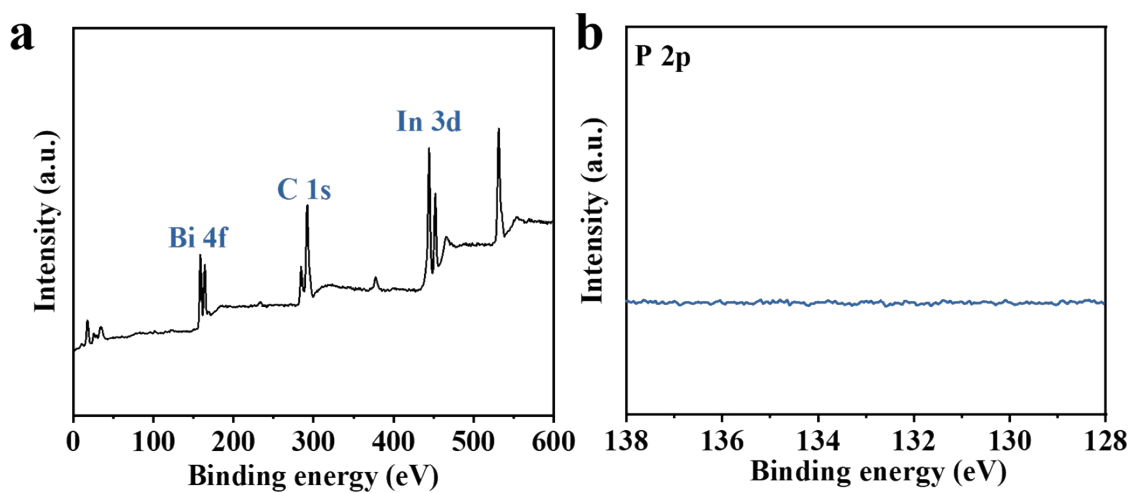

**Fig. S14.** (a) XPS survey spectra and (b) P 2p XPS spectra of BiIn-P pre-catalysts after the reaction.

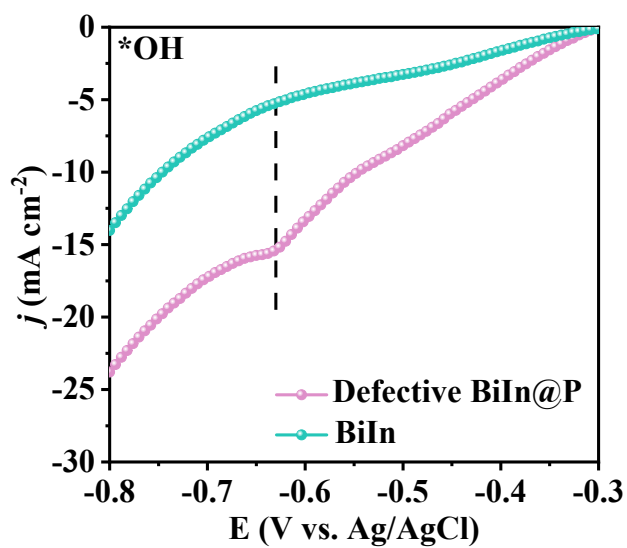

**Fig. S15.** LSV curves of Defective BiIn@P and BiIn in Ar-saturated 1.0 M KOH.

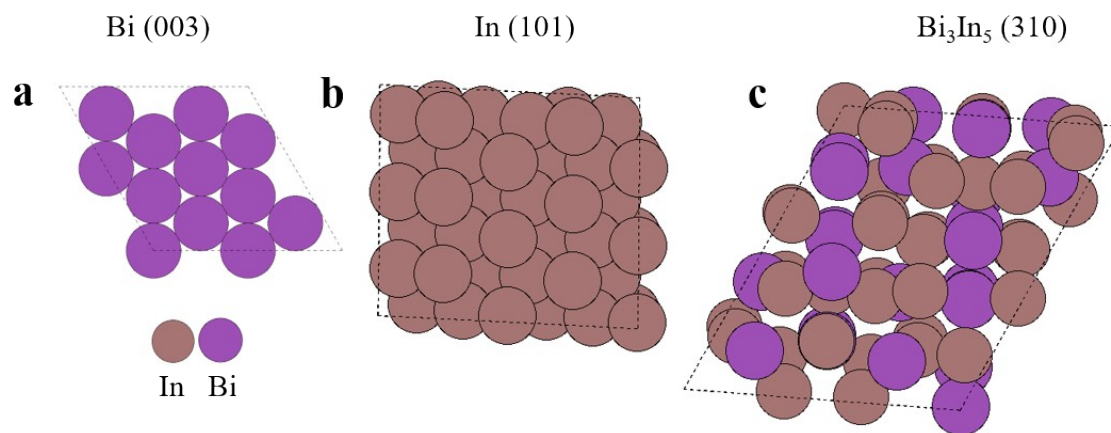

**Fig. S16.** DFT configurations for Bi (003), In (101), and Bi<sub>3</sub>In<sub>5</sub> (310), respectively.

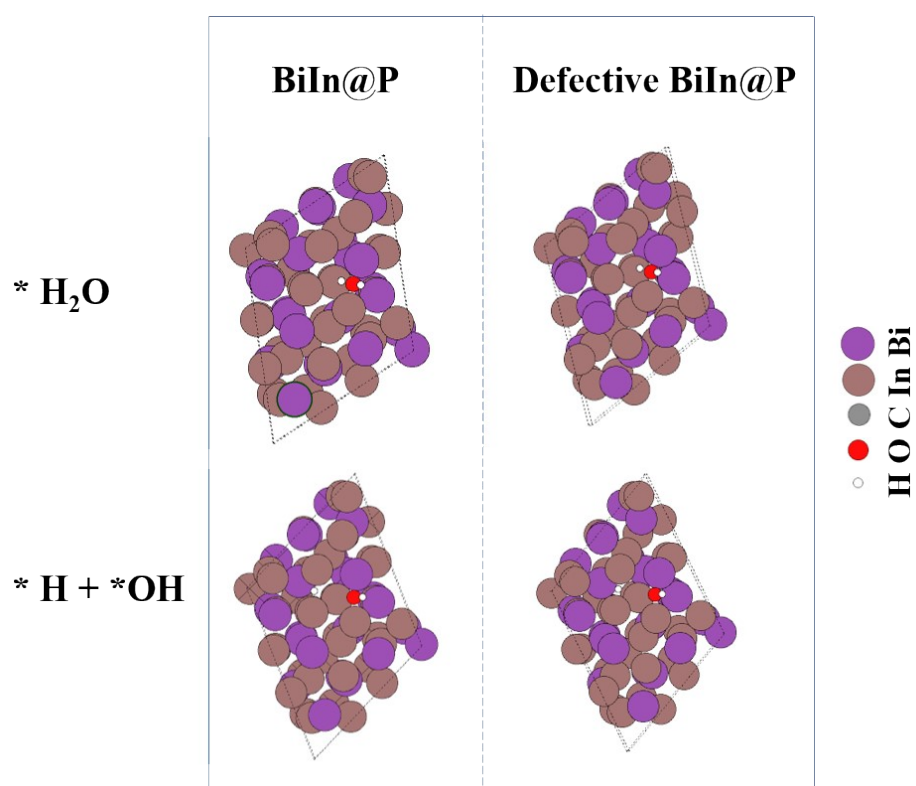

**Fig. S17.** DFT configurations for \*H<sub>2</sub>O and \*H + \*OH on the BiIn@P and Defective BiIn@P, respectively.

**Table S1.** Comparison of CO<sub>2</sub> electroreduction performance between Defective BiIn@P and reported catalysts.

| Catalyst                                | Current density                                    | FE <sub>HCOOH</sub> | Reference                                                         |
|-----------------------------------------|----------------------------------------------------|---------------------|-------------------------------------------------------------------|
| <b>Defective BiIn@P</b>                 | <b>500 mA cm<sup>-2</sup></b>                      | <b>97.3%</b>        | <b>This work</b>                                                  |
| SnPc-8F@CNTs                            | 404 mA cm <sup>-2</sup>                            | 91.7%               | <i>Appl. Catal. B: Environ.</i> , 2023, 123650.                   |
| Cu <sub>2</sub> S/1%SnO <sub>2</sub> @C | 15.6 mA cm <sup>-2</sup>                           | 88%                 | <i>J. Colloid Interface Sci.</i> , 2024, <b>655</b> , 909-919.    |
| BiOBr(BOB)                              | 148 mA cm <sup>-2</sup>                            | 91%                 | <i>Nat. Catal.</i> , 2023, <b>6</b> , 796-806.                    |
| S3-Cu <sub>2</sub> O-70                 | 100 mA cm <sup>-2</sup><br>400 mA cm <sup>-2</sup> | 75%<br>65%          | <i>Adv. Funct. Mater.</i> , 2023, <b>33</b> , 2213145.            |
| SnS <sub>2</sub> @SnO <sub>2</sub>      | 200 mA cm <sup>-2</sup>                            | 92.2%               | <i>ACS Appl. Mater. Interfaces</i> , 2023, <b>15</b> , 7529-7537. |
| PbCO <sub>3</sub> @CNS                  | 9.65 mA cm <sup>-2</sup>                           | 98.15%              | <i>Appl. Catal. B: Environ.</i> , 2023, 326, 122404.              |
| PdCuAuAgBiIn                            | 200 mA cm <sup>-2</sup>                            | 87%                 | <i>Adv. Mater.</i> , 2023, <b>35</b> , 2209242.                   |
| In/In <sub>2</sub> O <sub>3</sub> -1600 | 140 mA cm <sup>-2</sup>                            | 94%                 | <i>Adv. Funct. Mater.</i> , 2023, <b>33</b> , 2209114.            |
| BiOI                                    | 94 mA cm <sup>-2</sup>                             | 90%                 | <i>J. Mater. Chem. A.</i> , 2022, <b>10</b> , 1309-1319.          |
| Bismuthene nanoflakes                   | 10.5 mA cm <sup>-2</sup>                           | 96.3%               | <i>Nano Lett.</i> , 2023, <b>23</b> , 10512–10521.                |
| BH-10                                   | 444.1 mA cm <sup>-2</sup>                          | 95.7%               | <i>Angew. Chem. Int. Ed.</i> , 2023, <b>62</b> , e202313522.      |
| Ti-Bi NSs                               | 224 mA cm <sup>-2</sup>                            | 96.3%               | <i>Small</i> , 2023, <b>19</b> , 2302253.                         |

|                                            |                              |       |                                                                     |
|--------------------------------------------|------------------------------|-------|---------------------------------------------------------------------|
| BiNN-CFs                                   | over 400 mA cm <sup>-2</sup> | 95.7% | <i>Adv. Energy Mater.</i> , 2022, <b>12</b> , 2103960.              |
| Bi <sub>5</sub> Sn <sub>60</sub>           | 34 mA cm <sup>-2</sup>       | 94.8% | <i>Chem. Eng. J.</i> , 2022, <b>428</b> , 130901.                   |
| S-Bi-NSs                                   | over 300 mA cm <sup>-2</sup> | ~98%  | <i>ACS Appl. Mater. Interfaces.</i> , 2021, <b>13</b> , 20589–20597 |
| Bi <sub>5</sub> In <sub>5</sub> nanofibers | ~225 mA cm <sup>-2</sup>     | 96.8% | <i>J. Mater. Chem. A</i> , 2023, <b>11</b> , 11445-11453.           |
| BiIn <sub>5</sub> -500@C                   | ~8 mA cm <sup>-2</sup>       | 97.5% | <i>J. Colloid Interface Sci.</i> , 2022, <b>612</b> , 235-245.      |
| BiIn alloy NPs                             | 250 mA cm <sup>-2</sup>      | 97.8% | <i>Appl. Catal. B: Environ.</i> , 2023, 311, 121377.                |

## References

- 1 G. Kresse, J. Hafner, Ab initio molecular-dynamics simulation of the liquid-metal--amorphous-semiconductor transition in germanium, *Phys. Rev. B*, 1994, **49**, 14251-14269.
- 2 G. Kresse, J. Furthmüller, Efficient iterative schemes for ab initio total-energy calculations using a plane-wave basis set, *Phys. Rev. B*, 1996, **54**, 11169-11186.
- 3 L. Li, A. Ozden, S. Guo, F.P. Garci, A. de Arquer, C. Wang, M. Zhang, J. Zhang, H. Jiang, W. Wang, H. Dong, D. Sinton, E.H. Sargent, M. Zhong, Stable, active CO<sub>2</sub> reduction to formate via redox-modulated stabilization of active sites, *Nat. Commun.* 2021, **12**, 5223.
